# Supplementary material for: Phylogenomic analysis unravels evolution of yellow fever virus within hosts
Source: PubMed Central journal article supplement (PMC6143276; doi:10.1371/journal.pntd.0006738), 2018-09-06
Supplement: pntd.0006738.s004.pdf [file pntd.0006738.s004.pdf]

**Table S1. Sequencing data from continuous clinical samples of YFV**

| ID | Sample Name | Amplicon sequencing |          |                        |                             | Total RNA sequencing |                        |                    | Total Genome coverage assembled with NGS and Sanger data |
|----|-------------|---------------------|----------|------------------------|-----------------------------|----------------------|------------------------|--------------------|----------------------------------------------------------|
|    |             | Reads #             | Coverage | Mean Depth of Coverage | Primer Set(Failed paires)   | Reads #              | Reads # matched to YFV | Matched percentage |                                                          |
| 1  | YF-BJ1/7D   | 1,940,500           | 10,805   | 30,981.16              | Set2                        | -                    | -                      | -                  | 10,732                                                   |
| 2  | YF-BJ1/8D   | 1,661,085           | 10,649   | 19,665.84              | Set2                        | -                    | -                      | -                  | 10,650                                                   |
| 3  | YF-BJ1/9D   | 3,303,973           | 10,724   | 35,682.06              | S076, set 2; S052,set 1     | -                    | -                      | -                  | 10,725                                                   |
| 4  | YF-BJ1/6Db* | 1,665,809           | 5,828    | 42,634.84              | Set2(Failed, 2,3,6,9,11,12) | -                    | -                      | -                  | 5,830                                                    |
| 5  | YF-BJ1/7Db* | 1,739,605           | 10,004   | 26,201.57              | Set2(Failed,12)             | -                    | -                      | -                  | 10,005                                                   |
| 6  | YF-BJ1/8Db* | 1,870,603           | 10,004   | 29,883.67              | Set2(Failed,12)             | -                    | -                      | -                  | 10,005                                                   |
| 7  | YF-BJ1/9Db* | 1,548,543           | 5,915    | 43,807.15              | Set2(Failed,3,5,6,8,9,12)   | -                    | -                      | -                  | 5,916                                                    |
| 8  | YF-BJ2/16D  | 1,924,145           | 10,649   | 30,205.37              | Set2                        | 75,716,292           | 380                    | 0.001%             | 10,650                                                   |
| 9  | YF-BJ3/8D   | 1,451,105           | 10,392   | 27,585.82              | Set1                        | 6,577,410            | 5,052                  | 0.086%             | 10,393                                                   |
| 10 | YF-BJ3/10D  | 2,736,970           | 10,472   | 65,340.19              | Set2                        | 2,756,328            | 28,183                 | 1.246%             | 10,405                                                   |
| 11 | YF-BJ3/14D  | 4,034,937           | 10,396   | 55,045.55              | Set1                        | 3,001,579            | 5,294                  | 0.202%             | 10,397                                                   |
| 12 | YF-BJ3/17D  | 1,998,163           | 10,392   | 36,668.93              | Set1                        | 6,602,261            | 2,184                  | 0.039%             | 10,393                                                   |
| 13 | YF-BJ3/20D  | 1,920,032           | 10,649   | 28,888.97              | Set2                        | -                    | -                      | -                  | 10,650                                                   |
| 14 | YF-BJ3/32D  | 1,424,735           | 9,917    | 21,802.37              | Set2                        | -                    | -                      | -                  | 9,918                                                    |
| 15 | YF-BJ4/19D  | -                   | -        | -                      | -                           | 56,728,408           | 873                    | 0.002%             | 10,674                                                   |
| 16 | YF-BJ5/6D   | 2,001,845           | 10,392   | 37,822.96              | Set1                        | -                    | -                      | -                  | 10,394                                                   |
| 17 | YF-BJ5/10D  | 1,684,026           | 10,395   | 18,544.42              | Set1                        | -                    | -                      | -                  | 10,398                                                   |
| 18 | YF-BJ5/14D  | 2,090,128           | 10,392   | 16,558.65              | Set1                        | -                    | -                      | -                  | 10,393                                                   |
| 19 | YF-FZ1/6D   | -                   | -        | -                      | -                           | 77,238,978           | 129                    | 0.000%             | 1,012                                                    |
| 20 | YF-FZ2/16D  | -                   | -        | -                      | -                           | 58,570,126           | 195                    | 0.000%             | 10,243                                                   |
| 21 | YF-FZ3/14D  | -                   | -        | -                      | -                           | 50,462,246           | 68                     | 0.000%             | 839                                                      |
| 22 | YF-FZ4/7D   | -                   | -        | -                      | -                           | -                    | -                      | -                  | 10,222                                                   |
| 23 | YF-FZ5/6D   | -                   | -        | -                      | -                           | 56,605,654           | 68                     | 0.000%             | 2,795                                                    |
| 24 | YF-FZ6/20D  | -                   | -        | -                      | -                           | 51,627,058           | 4,722                  | 0.010%             | 10,838                                                   |
| 25 | YF-FZ7/15D  | -                   | -        | -                      | -                           | 64,345,650           | 3,945                  | 0.007%             | 10,311                                                   |

\*Sample from blood
