# Supplementary material for: Phylogenomic analysis unravels evolution of yellow fever virus within hosts
Source: PubMed Central journal article supplement (PMC6143276; doi:10.1371/journal.pntd.0006738), 2018-09-06
Supplement: pntd.0006738.s005.pdf [file pntd.0006738.s005.pdf]

**Table S2. Public sequences used for phylogenetic analysis**

| StrainName           | Source of isolation        | Place of isolation         | Date of isolation | Accession number |
|----------------------|----------------------------|----------------------------|-------------------|------------------|
| Angola 71            | Human                      | Angola                     | 1971              | AY968064         |
| Couma-Ethiopia 61    | Human                      | Ethiopia                   | 1961              | DQ235229         |
| Uganda 48            | Human                      | Uganda                     | 1948              | AY968065         |
| Uganda2010           | Human                      | Uganda                     | 2010              | JN620362         |
| Ivory_Coast99        | Human                      | Ivory Coast                | 1999              | AY603338         |
| HD 117294            | Human                      | Koungheul/Senegal          | 1995              | JX898868         |
| Gambia 01            | Human                      | Gambia                     | 2001              | AY572535         |
| ArD 149214           | <i>Aedes furcifer</i>      | Koungheul/Senegal          | 2000              | JX898873         |
| ArD 149194           | <i>Aedes taylori</i>       | Koungheul/Senegal          | 2000              | JX898874         |
| ArD 121040           | <i>Aedes furcifer</i>      | Koungheul/Senegal          | 1996              | JX898870         |
| ArD 149815           | <i>Aedes furcifer</i>      | Koungheul/Senegal          | 2000              | JX898875         |
| AR378600             | <i>Haemagogus sp.</i>      | Uruaçu, GO/Brazilian       | 1980              | JF912179         |
| ArD 181564           | <i>Aedes luteocephalus</i> | Koungheul/Senegal          | 2005              | JX898880         |
| ArD 156468           | <i>Aedes furcifer</i>      | Koungheul/Senegal          | 2001              | JX898876         |
| ArD 181464           | <i>Aedes furcifer</i>      | Koungheul/Senegal          | 2005              | JX898877         |
| ArD 181250           | <i>Aedes furcifer</i>      | Koungheul/Senegal          | 2005              | JX898878         |
| ArD 181676           | <i>Aedes taylori</i>       | Koungheul/Senegal          | 2005              | JX898879         |
| ArD 181439           | <i>Aedes luteocephalus</i> | Koungheul/Senegal          | 2005              | JX898881         |
| BeH463676            | Human                      | Breves, PA/Brazilian       | 1987              | JF912184         |
| BeAR513008           | Human                      | Sidrolândia, MS/Brazilian  | 1992              | JF912185         |
| BeH622205            | Human                      | Uruaçu, GO/Brazilian       | 2000              | JF912187         |
| BeH622493            | Human                      | Alto Paraíso, GO/Brazilian | 2000              | JF912188/Asibi   |
| Asibi                | Human                      | Ghana                      | 1927              | AY640589         |
| Asibi                | Vaccine                    | Ghana                      | 1972              | KF769016         |
| DakArAmt7            | <i>Aedes africanus</i>     | Cote d'Ivoire              | 1973              | JX898869         |
| French viscerotropic | Vaccine                    | -                          | -                 | U21056           |
| BeH394880            | Human                      | C. do Araguaia, PA         | 1981              | JF912180         |
| ArD 114972           | <i>Aedes aegyptia</i>      | Koungheul/Senegal          | 1995              | JX898872         |
| ArD 114896           | <i>Aedes aegyptia</i>      | Koungheul/Senegal          | 1995              | JX898871         |
| French neurotropic   | Vaccine                    | -                          | -                 | U21055           |
| Trinidad1979         | Human                      | Trinidad                   | 1979              | AF094612         |
| BeH423602            | Human                      | São Domingos do Capim, PA  | 1984              | JF912183         |
| BeAR646536           | <i>H. Leucocelaenus</i>    | S.A. Missões, RS           | 2001              | JF912189         |
| BeH526722            | Human                      | Arinos, MG                 | 1994              | JF912186         |
| BeH655417            | Human                      | Alto Paraíso, GO/Brazilian | 2002              | JF912190         |
| Coast82              | Human                      | Ivory Coast                | 1982              | U54798           |
| BeH422973            | Human                      | Monte Alegre, PA           | 1984              | JF912182         |
| Bol 88/1999          | Human                      | Santa-Cruz/Bolivia         | 2009              | KF907504         |
| BeH413820            | Human                      | Porto Velho, RO            | 1983              | JF912181         |
| 17DD                 | Vaccine                    | -                          | -                 | U17066           |
| 17D-P11B             | Vaccine                    | -                          | -                 | JN811142         |

|                        |                           |                     |      |           |
|------------------------|---------------------------|---------------------|------|-----------|
| 17D-P11C               | Vaccine                   | -                   | -    | JN811143  |
| YFV case 1             | Vaccine adverse event     | Peru                | -    | GQ379162  |
| 17Db                   | Vaccine                   | -                   | -    | X03700    |
| YF-AVD2791-93F/04      | Vaccine                   | -                   | -    | DQ118157  |
| 17D-204                | Vaccine                   | -                   | -    | KF769015  |
| 17D RKI                | Vaccine                   | -                   | -    | JN628279  |
| 17D Flavimun WSL       | Vaccine                   | -                   | -    | JN628280  |
| 17D Flavimun TVX       | Vaccine                   | -                   | -    | JN628281  |
| 17D-P1                 | Vaccine                   | -                   | -    | JN811140  |
| 17D-P11A               | Vaccine                   | -                   | -    | JN811141  |
| Sanofi-Pasteur-17D-204 | Vaccine                   | USA                 | -    | JX503529  |
| 17Da                   | Vaccine                   | -                   | -    | NC_002031 |
| 17DD-Brazil            | Vaccine                   | -                   | -    | DQ100292  |
| 17D-213                | Vaccine                   | -                   | -    | U17067    |
| 17D/Tiantan            | Vaccine                   | -                   | -    | FJ654700  |
| YFV case 2             | Vaccine adverse event     | Peru                | -    | GQ379163  |
| SAH177                 | Wesselsbron               | -                   | -    | EU707555  |
| Wesselsbron            | Wesselsbron               | -                   | -    | NC_012735 |
| UgIL-30                | Entebbe bat virus         | -                   | -    | DQ837641  |
| Entebbe bat virus      | Entebbe bat virus         | -                   | -    | NC_008718 |
| MK7148                 | Sepik virus               | -                   | -    | DQ837642  |
| Sepik virus            | Sepik virus               | -                   | -    | NC_008719 |
| TVP11767               | <i>Alouatta seniculus</i> | Trinidad and Tobago | 2009 | HM582851  |
