# Supplementary material for: Phylogenomic analysis unravels evolution of yellow fever virus within hosts
Source: PubMed Central journal article supplement (PMC6143276; doi:10.1371/journal.pntd.0006738), 2018-09-06
Supplement: pntd.0006738.s006.pdf [file pntd.0006738.s006.pdf]

**Table S3. Phasing analysis for continuous stretched iSNV**

| Stretched iSNV GroupID | Sample | Pos   | Ref > Alt | MuAF | CDS        | Phased ? | Phased read ratio | Phased mutant read No. | Unphased mutant read No. | Wild-type read No. |
|------------------------|--------|-------|-----------|------|------------|----------|-------------------|------------------------|--------------------------|--------------------|
| 1                      | S056   | 4278  | A>G       | 0.10 | NS2b       |          |                   |                        |                          |                    |
| 1                      | S056   | 4356  | A>G       | 0.07 | NS2b       | No       | 2.09%             | 49                     | 2,295                    | 26,896             |
| 1                      | S056   | 4547  | T>G       | 0.06 | NS2b       |          |                   |                        |                          |                    |
| 2                      | S057   | 2392  | A>T       | 0.08 | E          | No       | 0.00%             | 1                      | 2,495                    | 12,239             |
| 2                      | S057   | 2400  | G>T       | 0.08 | E          |          |                   |                        |                          |                    |
| 3                      | S060   | 1096  | C>T       | 0.26 | E          | No       | 9.10%             | 1,255                  | 12,496                   | 4,127              |
| 3                      | S060   | 1241  | A>G       | 0.58 | E          |          |                   |                        |                          |                    |
| 4                      | S060   | 5412  | A>G       | 0.15 | NS3        | No       | 6.60%             | 59                     | 825                      | 1,192              |
| 4                      | S060   | 5640  | C>T       | 0.10 | NS3        |          |                   |                        |                          |                    |
| 5                      | S077   | 10360 | G>A       | 0.15 | 3' UTR     |          |                   |                        |                          |                    |
| 5                      | S077   | 10365 | T>G       | 0.19 | 3' UTR     |          |                   |                        |                          |                    |
| 5                      | S077   | 10367 | C>T       | 0.19 | 3' UTR     | Yes      | 96.47%            | 17,971                 | 658                      | 64,670             |
| 5                      | S077   | 10373 | G>A       | 0.22 | 3' UTR     |          |                   |                        |                          |                    |
| 5                      | S077   | 10398 | T>C       | 0.39 | 3' UTR     |          |                   |                        |                          |                    |
| 6                      | S078   | 10360 | G>A       | 0.13 | 3' UTR     |          |                   |                        |                          |                    |
| 6                      | S078   | 10365 | T>G       | 0.16 | 3' UTR     |          |                   |                        |                          |                    |
| 6                      | S078   | 10367 | C>T       | 0.16 | 3' UTR     | Yes      | 96.14%            | 19,615                 | 787                      | 65,163             |
| 6                      | S078   | 10373 | G>A       | 0.19 | 3' UTR     |          |                   |                        |                          |                    |
| 6                      | S078   | 10398 | T>C       | 0.35 | 3' UTR     |          |                   |                        |                          |                    |
| 6                      | S078   | 10425 | A>G       | 0.50 | 3' UTR     |          |                   |                        |                          |                    |
| 7                      | S079   | 10360 | G>A       | 0.15 | 3' UTR     |          |                   |                        |                          |                    |
| 7                      | S079   | 10365 | T>G       | 0.18 | 3' UTR     |          |                   |                        |                          |                    |
| 7                      | S079   | 10367 | C>T       | 0.18 | 3' UTR     | Yes      | 96.23%            | 16,133                 | 632                      | 58,637             |
| 7                      | S079   | 10373 | G>A       | 0.22 | 3' UTR     |          |                   |                        |                          |                    |
| 7                      | S079   | 10398 | T>C       | 0.39 | 3' UTR     |          |                   |                        |                          |                    |
| 8                      | S080   | 10360 | G>A       | 0.16 | 3' UTR     |          |                   |                        |                          |                    |
| 8                      | S080   | 10365 | T>G       | 0.19 | 3' UTR     |          |                   |                        |                          |                    |
| 8                      | S080   | 10367 | C>T       | 0.19 | 3' UTR     | Yes      | 95.38%            | 22,580                 | 1,093                    | 77,870             |
| 8                      | S080   | 10373 | G>A       | 0.22 | 3' UTR     |          |                   |                        |                          |                    |
| 8                      | S080   | 10398 | T>C       | 0.41 | 3' UTR     |          |                   |                        |                          |                    |
| 9                      | S112   | 624   | C>T       | 0.09 | M          | No       | 0.70%             | 19                     | 2,390                    | 10,605             |
| 9                      | S112   | 669   | T>C       | 0.09 | M          |          |                   |                        |                          |                    |
| 10                     | S112   | 1019  | T>C       | 0.16 | E          |          |                   |                        |                          |                    |
| 10                     | S112   | 1243  | A>G       | 0.12 | E          |          |                   |                        |                          |                    |
| 10                     | S112   | 1479  | G>C       | 0.19 | E          | No       | 0.50%             | 28                     | 5,547                    | 5,418              |
| 10                     | S112   | 1504  | A>C       | 0.21 | E          |          |                   |                        |                          |                    |
| 10                     | S112   | 1605  | A>G       | 0.33 | E          |          |                   |                        |                          |                    |
| 11                     | S112   | 6632  | C>G       | 0.54 | NS4a       | No       | 4.70%             | 155                    | 3,118                    | 1,099              |
| 11                     | S112   | 6820  | T>A       | 0.24 | 2k protein |          |                   |                        |                          |                    |
| 12                     | S112   | 7627  | A>G       | 0.06 | NS4b       |          |                   |                        |                          |                    |
| 12                     | S112   | 7649  | C>T       | 0.36 | NS5        | No       | 1.56%             | 413                    | 26,062                   | 4,373              |
| 12                     | S112   | 7761  | A>G       | 0.28 | NS5        |          |                   |                        |                          |                    |
| 13                     | S112   | 9452  | G>T       | 0.23 | NS5        | No       | 3.50%             | 74                     | 2,040                    | 4,094              |
| 13                     | S112   | 9610  | G>T       | 0.12 | NS5        |          |                   |                        |                          |                    |
| 14                     | S112   | 10360 | G>A       | 0.10 | 3' UTR     |          |                   |                        |                          |                    |
| 14                     | S112   | 10365 | T>G       | 0.12 | 3' UTR     |          |                   |                        |                          |                    |
| 14                     | S112   | 10367 | C>T       | 0.12 | 3' UTR     | Yes      | 93.34%            | 14,574                 | 1,040                    | 94,768             |
| 14                     | S112   | 10373 | G>A       | 0.14 | 3' UTR     |          |                   |                        |                          |                    |

|    |      |       |     |      |        |            |        |        |        |         |
|----|------|-------|-----|------|--------|------------|--------|--------|--------|---------|
| 14 | S112 | 10398 | T>C | 0.27 | 3' UTR |            |        |        |        |         |
| 15 | S126 | 7648  | G>A | 0.05 | NS5    | <b>No</b>  | 0.40%  | 1      | 204    | 1,358   |
| 15 | S126 | 7876  | G>A | 0.07 | NS5    |            |        |        |        |         |
| 16 | S126 | 10360 | G>A | 0.06 | 3' UTR |            |        |        |        |         |
| 16 | S126 | 10365 | T>G | 0.08 | 3' UTR |            |        |        |        |         |
| 16 | S126 | 10367 | C>T | 0.08 | 3' UTR | <b>Yes</b> | 95.68% | 12,815 | 579    | 91,430  |
| 16 | S126 | 10373 | G>A | 0.09 | 3' UTR |            |        |        |        |         |
| 16 | S126 | 10398 | T>C | 0.32 | 3' UTR |            |        |        |        |         |
| 16 | S126 | 10425 | A>G | 0.51 | 3' UTR |            |        |        |        |         |
| 17 | S157 | 8365  | C>T | 0.09 | NS5    | <b>No</b>  | 0.00%  | 29     | 31,610 | 124,479 |
| 17 | S157 | 8394  | T>C | 0.09 | NS5    |            |        |        |        |         |
