# Supplementary material for: Phylogenomic analysis unravels evolution of yellow fever virus within hosts
Source: PubMed Central journal article supplement (PMC6143276; doi:10.1371/journal.pntd.0006738), 2018-09-06
Supplement: pntd.0006738.s007.pdf [file pntd.0006738.s007.pdf]

**Table S4 - Duration of viremia and evolutionary rates of YFV,ZIKV and DENV**

| <b>Virus</b> | <b>Viremia duration</b> | <b>Descriptions in CDC (website)</b>                                                                                                                                                    | <b>Evolutionion rate</b>               | <b>Reference</b> |
|--------------|-------------------------|-----------------------------------------------------------------------------------------------------------------------------------------------------------------------------------------|----------------------------------------|------------------|
| YFV          | 3 days                  | approximately 3 days ( <a href="https://www.cdc.gov/yellowfever/">https://www.cdc.gov/yellowfever/</a> )                                                                                | $\sim 4.2 \times 10^{-4}$              | ref. 10          |
| ZIKV         | 4-7 days                | a few days to a week ( <a href="https://www.cdc.gov/zika/">https://www.cdc.gov/zika/</a> )<br>highest in the first 3 or 4 days after onset of fever and then last for the next few days | $0.98 \text{ to } 1.06 \times 10^{-3}$ | ref. 6           |
| DENV         | 3-7 days                | ( <a href="https://www.cdc.gov/dengue/">https://www.cdc.gov/dengue/</a> )                                                                                                               | $7.77 \text{ to } 9.85 \times 10^{-4}$ |                  |
| DENV-1       | -                       | -                                                                                                                                                                                       | $7.773 \times 10^{-4}$                 | ref. 25          |
| DENV-2       | -                       | -                                                                                                                                                                                       | $8.600 \times 10^{-4}$                 |                  |
| DENV-3       | -                       | -                                                                                                                                                                                       | $9.851 \times 10^{-4}$                 |                  |
| DENV-4       | -                       | -                                                                                                                                                                                       | $9.712 \times 10^{-4}$                 |                  |
