# Supplementary material for: Phylogenomic analysis unravels evolution of yellow fever virus within hosts
Source: PubMed Central journal article supplement (PMC6143276; doi:10.1371/journal.pntd.0006738), 2018-09-06
Supplement: pntd.0006738.s008.pdf [file pntd.0006738.s008.pdf]

**Table S5. Two primers set used for amplicon-sequencing**

| <b>ID</b> | <b>L primer</b>        | <b>%GC*</b> | <b>TM<sup>S</sup></b> | <b>Position<sup>#</sup></b> |
|-----------|------------------------|-------------|-----------------------|-----------------------------|
| Set1-1    | TAAAACCCTGGGCGTCAAT    | 47.368      | 59.958                | 143                         |
| Set1-2    | GGCACAAAGAAGGGAGTTCA   | 50          | 59.932                | 2140                        |
| Set1-3    | CCTCATAATGGGCTTGACC    | 55          | 59.968                | 4108                        |
| Set1-4    | GCTTCCATGCTCCTGGATAA   | 50          | 59.823                | 6054                        |
| Set1-5    | ATTCGGTGGAAACCGTCATT   | 47.368      | 59.814                | 8243                        |
| Set2-1    | CGTTCGTTGAGCGATTAGC    | 52.632      | 59.213                | 83                          |
| Set2-2    | CGTACTCTGCCATTGCATA    | 50          | 59.345                | 967                         |
| Set2-3    | ACGGTGGTCACGTCTCCT     | 61.111      | 58.645                | 1804                        |
| Set2-4    | TCGTCCAAGACCCAAAGAAC   | 50          | 59.718                | 2719                        |
| Set2-5    | GAGCGATGTTAGTGGGACAAG  | 52.381      | 59.389                | 3625                        |
| Set2-6    | GGAGGAGTGGGGATGTTCTT   | 55          | 59.947                | 4567                        |
| Set2-7    | GGCTCATAGAGCAAGAGCAAAT | 45.455      | 59.682                | 5486                        |
| Set2-8    | CGGAGCAAAAAGAGCATTG    | 47.368      | 59.184                | 6341                        |
| Set2-9    | GGATTAAGCCCAGCAATCA    | 45          | 59.687                | 7267                        |
| Set2-10   | AACTGAGGGTGAGAGGACCTTA | 50          | 58.905                | 8105                        |
| Set2-11   | TGATGGGAAAGAGGGAAAAG   | 45          | 58.741                | 9004                        |
| Set2-12   | CAGCAAAGCTTATGCAAACA   | 40          | 57.39                 | 9914                        |

| <b>ID</b> | <b>R primer</b>        | <b>%GC*</b> | <b>TM<sup>S</sup></b> | <b>Position<sup>#</sup></b> |
|-----------|------------------------|-------------|-----------------------|-----------------------------|
| Set1-1    | GCCAAACACGGTATGGATTC   | 50          | 59.839                | 2272                        |
| Set1-2    | ATCAACTCTCCCTGCCACAC   | 55          | 59.652                | 4309                        |
| Set1-3    | CAACCACACTGGCAAATCAC   | 50          | 59.619                | 6202                        |
| Set1-4    | GCGTGCCTATCGGAAGAATA   | 50          | 59.847                | 8411                        |
| Set1-5    | GTCTTTCCCTGGCGTCAATA   | 50          | 59.714                | 10731                       |
| Set2-1    | TCAGGGGCCATTACAGTCA    | 52.632      | 59.663                | 1166                        |
| Set2-2    | CGTTAGGTCATCTGCCACAA   | 50          | 59.338                | 2064                        |
| Set2-3    | TGTTAGAGAAGGGGCACTCC   | 55          | 58.918                | 2899                        |
| Set2-4    | GGCATCTCCTCCGTTGTTAAT  | 47.619      | 59.992                | 3741                        |
| Set2-5    | CAGGTGCTCACATTCCTCAA   | 50          | 59.439                | 4656                        |
| Set2-6    | CACCATTGGAGTGAGGGAAC   | 55          | 59.98                 | 5644                        |
| Set2-7    | ACCCTTCTTTGCCAGGAAAT   | 45          | 59.596                | 6586                        |
| Set2-8    | ATTTCTGGGGCTTCCTCAA    | 47.368      | 59.248                | 7419                        |
| Set2-9    | TGGAATTCCTGGAAAGAGGAT  | 42.857      | 59.542                | 8353                        |
| Set2-10   | CCCAAGAGCCTCAAACCTCAA  | 50          | 60                    | 9118                        |
| Set2-11   | CATCTAGCATGTCCTCAGTGGT | 50          | 58.873                | 10090                       |
| Set2-12   | GTGTTTTGTCATCCAAAGGTCT | 40.909      | 57.732                | 10827                       |

\* %GC, GC content

\$ TM, Primer melting temperature

# position in reference genome
