# Supplementary material for: Phylogenomic analysis unravels evolution of yellow fever virus within hosts
Source: PubMed Central journal article supplement (PMC6143276; doi:10.1371/journal.pntd.0006738), 2018-09-06
Supplement: pntd.0006738.s009.pdf [file pntd.0006738.s009.pdf]

Table S6: SNPs observed in YFV

| ID of SNP | Samples    | Reference       |      |               |             |        | Our sequences |                 |             |                   |        |             |
|-----------|------------|-----------------|------|---------------|-------------|--------|---------------|-----------------|-------------|-------------------|--------|-------------|
|           |            | Sites in Genome | Gene | Sites in Gene | Nucleotides | Codons | Amino Acids   | Sites in Codons | Amino acids | Major nucleotides | Codons | Amino Acids |
| 1         | YF-BJ1/8D  | 900             | M    | 417           | T           | GCT    | A             | 3               | 139         | C                 | GCC    | A           |
| 2         | YF-BJ1/8D  | 1974            | E    | 999           | C           | CCC    | P             | 3               | 333         | T                 | CCT    | P           |
| 3         | YF-BJ1/8D  | 2352            | E    | 1377          | A           | GCA    | A             | 3               | 459         | C                 | GCC    | A           |
| 4         | YF-BJ1/8D  | 3918            | NS2a | 408           | C           | ATC    | I             | 3               | 136         | A                 | ATA    | I           |
| 5         | YF-BJ1/8D  | 6463            | NS4a | 22            | G           | GTC    | V             | 1               | 8           | A                 | ATC    | I           |
| 6         | YF-BJ1/8D  | 7320            | NS4b | 432           | A           | GTA    | V             | 3               | 144         | G                 | GTG    | V           |
| 7         | YF-BJ1/8D  | 9783            | NS5  | 2142          | T           | TCT    | S             | 3               | 714         | C                 | TCC    | S           |
| 8         | YF-BJ1/9D  | 900             | M    | 417           | T           | GCT    | A             | 3               | 139         | C                 | GCC    | A           |
| 9         | YF-BJ1/9D  | 1974            | E    | 999           | C           | CCC    | P             | 3               | 333         | T                 | CCT    | P           |
| 10        | YF-BJ1/9D  | 2352            | E    | 1377          | A           | GCA    | A             | 3               | 459         | C                 | GCC    | A           |
| 11        | YF-BJ1/9D  | 3918            | NS2a | 408           | C           | ATC    | I             | 3               | 136         | A                 | ATA    | I           |
| 12        | YF-BJ1/9D  | 6463            | NS4a | 22            | G           | GTC    | V             | 1               | 8           | A                 | ATC    | I           |
| 13        | YF-BJ1/9D  | 7320            | NS4b | 432           | A           | GTA    | V             | 3               | 144         | G                 | GTG    | V           |
| 14        | YF-BJ1/9D  | 9783            | NS5  | 2142          | T           | TCT    | S             | 3               | 714         | C                 | TCC    | S           |
| 37        | YF-BJ5/6D  | 900             | M    | 417           | T           | GCT    | A             | 3               | 139         | C                 | GCC    | A           |
| 38        | YF-BJ5/6D  | 2352            | E    | 1377          | A           | GCA    | A             | 3               | 459         | C                 | GCC    | A           |
| 39        | YF-BJ5/6D  | 3918            | NS2a | 408           | C           | ATC    | I             | 3               | 136         | A                 | ATA    | I           |
| 40        | YF-BJ5/6D  | 6463            | NS4a | 22            | G           | GTC    | V             | 1               | 8           | A                 | ATC    | I           |
| 41        | YF-BJ5/6D  | 9003            | NS5  | 1362          | C           | AAC    | N             | 3               | 454         | T                 | AAT    | N           |
| 42        | YF-BJ5/10D | 900             | M    | 417           | T           | GCT    | A             | 3               | 139         | C                 | GCC    | A           |
| 43        | YF-BJ5/10D | 2352            | E    | 1377          | A           | GCA    | A             | 3               | 459         | C                 | GCC    | A           |
| 44        | YF-BJ5/10D | 3918            | NS2a | 408           | C           | ATC    | I             | 3               | 136         | A                 | ATA    | I           |
| 45        | YF-BJ5/10D | 6463            | NS4a | 22            | G           | GTC    | V             | 1               | 8           | A                 | ATC    | I           |
| 46        | YF-BJ5/10D | 9003            | NS5  | 1362          | C           | AAC    | N             | 3               | 454         | T                 | AAT    | N           |
| 47        | YF-BJ5/14D | 900             | M    | 417           | T           | GCT    | A             | 3               | 139         | C                 | GCC    | A           |
| 48        | YF-BJ5/14D | 2352            | E    | 1377          | A           | GCA    | A             | 3               | 459         | C                 | GCC    | A           |
| 49        | YF-BJ5/14D | 3918            | NS2a | 408           | C           | ATC    | I             | 3               | 136         | A                 | ATA    | I           |
| 50        | YF-BJ5/14D | 6463            | NS4a | 22            | G           | GTC    | V             | 1               | 8           | A                 | ATC    | I           |
| 51        | YF-BJ5/14D | 9003            | NS5  | 1362          | C           | AAC    | N             | 3               | 454         | T                 | AAT    | N           |
| 52        | YF-BJ2/16D | 900             | M    | 417           | T           | GCT    | A             | 3               | 139         | C                 | GCC    | A           |
| 53        | YF-BJ2/16D | 2352            | E    | 1377          | A           | GCA    | A             | 3               | 459         | C                 | GCC    | A           |
| 54        | YF-BJ2/16D | 3470            | NS1  | 1016          | A           | AAA    | K             | 2               | 339         | G                 | AGA    | R           |
| 55        | YF-BJ2/16D | 3918            | NS2a | 408           | C           | ATC    | I             | 3               | 136         | A                 | ATA    | I           |
| 56        | YF-BJ2/16D | 4278            | NS2b | 96            | A           | ATA    | I             | 3               | 32          | G                 | ATG    | M           |
| 57        | YF-BJ2/16D | 6463            | NS4a | 22            | G           | GTC    | V             | 1               | 8           | A                 | ATC    | I           |
| 58        | YF-BJ2/16D | 7320            | NS4b | 432           | A           | GTA    | V             | 3               | 144         | G                 | GTG    | V           |
| 59        | YF-BJ2/16D | 8094            | NS5  | 453           | C           | TCC    | S             | 3               | 151         | T                 | TCT    | S           |
| 60        | YF-BJ2/16D | 8340            | NS5  | 699           | T           | GTT    | V             | 3               | 233         | C                 | GTC    | V           |
| 61        | YF-BJ2/16D | 10160           | NS5  | 2519          | T           | GTT    | V             | 2               | 840         | C                 | GCT    | A           |
| 62        | YF-BJ4/13D | 667             | M    | 184           | G           | GAT    | D             | 1               | 62          | T                 | TAT    | Y           |
| 63        | YF-BJ4/13D | 746             | M    | 263           | G           | AGG    | R             | 2               | 88          | C                 | ACG    | T           |
| 64        | YF-BJ4/13D | 840             | M    | 357           | G           | CAG    | Q             | 3               | 119         | C                 | CAC    | H           |
| 65        | YF-BJ4/13D | 900             | M    | 417           | T           | GCT    | A             | 3               | 139         | C                 | GCC    | A           |
| 66        | YF-BJ4/13D | 1881            | E    | 906           | C           | GAC    | D             | 3               | 302         | T                 | GAT    | D           |
| 67        | YF-BJ4/13D | 2352            | E    | 1377          | A           | GCA    | A             | 3               | 459         | C                 | GCC    | A           |

|     |            |           |      |   |     |   |   |       |     |   |
|-----|------------|-----------|------|---|-----|---|---|-------|-----|---|
| 68  | YF-BJ4/13D | 3197 NS1  | 743  | G | GGA | G | 2 | 248 A | GAA | E |
| 69  | YF-BJ4/13D | 3207 NS1  | 753  | G | GTG | V | 3 | 251 A | GTA | V |
| 70  | YF-BJ4/13D | 3248 NS1  | 794  | A | AAT | N | 2 | 265 T | ATT | I |
| 71  | YF-BJ4/13D | 3256 NS1  | 802  | T | TGG | W | 1 | 268 G | GGG | G |
| 72  | YF-BJ4/13D | 3258 NS1  | 804  | G | TGG | W | 3 | 268 A | TGA | * |
| 73  | YF-BJ4/13D | 3918 NS2a | 408  | C | ATC | I | 3 | 136 A | ATA | I |
| 74  | YF-BJ4/13D | 4206 NS2b | 24   | G | TTG | L | 3 | 8 A   | TTA | L |
| 75  | YF-BJ4/13D | 4276 NS2b | 94   | A | ATA | I | 1 | 32 G  | GTA | V |
| 76  | YF-BJ4/13D | 4598 NS3  | 26   | C | CCT | P | 2 | 9 T   | CTT | L |
| 77  | YF-BJ4/13D | 4954 NS3  | 382  | G | GCA | A | 1 | 128 T | TCA | S |
| 78  | YF-BJ4/13D | 4955 NS3  | 383  | C | GCA | A | 2 | 128 T | GTA | V |
| 79  | YF-BJ4/13D | 4956 NS3  | 384  | A | GCA | A | 3 | 128 C | GCC | A |
| 80  | YF-BJ4/13D | 4977 NS3  | 405  | T | AGT | S | 3 | 135 G | AGG | R |
| 81  | YF-BJ4/13D | 5015 NS3  | 443  | A | GAA | E | 2 | 148 G | GGA | G |
| 82  | YF-BJ4/13D | 5018 NS3  | 446  | T | GTG | V | 2 | 149 C | GCG | A |
| 83  | YF-BJ4/13D | 5066 NS3  | 494  | T | GTG | V | 2 | 165 C | GCG | A |
| 84  | YF-BJ4/13D | 5225 NS3  | 653  | G | AGA | R | 2 | 218 C | ACA | T |
| 85  | YF-BJ4/13D | 5277 NS3  | 705  | G | GAG | E | 3 | 235 A | GAA | E |
| 86  | YF-BJ4/13D | 5302 NS3  | 730  | G | GAT | D | 1 | 244 T | TAT | Y |
| 87  | YF-BJ4/13D | 5306 NS3  | 734  | T | GTG | V | 2 | 245 C | GCG | A |
| 88  | YF-BJ4/13D | 5307 NS3  | 735  | G | GTG | V | 3 | 245 C | GTC | V |
| 89  | YF-BJ4/13D | 6463 NS4a | 22   | G | GTC | V | 1 | 8 A   | ATC | I |
| 90  | YF-BJ4/13D | 7213 NS4b | 325  | C | CCT | P | 1 | 109 A | ACT | T |
| 91  | YF-BJ4/13D | 7271 NS4b | 383  | T | ATT | I | 2 | 128 A | AAT | N |
| 92  | YF-BJ4/13D | 7320 NS4b | 432  | A | GTA | V | 3 | 144 G | GTG | V |
| 93  | YF-BJ4/13D | 7566 NS4b | 678  | T | ACT | T | 3 | 226 C | ACC | T |
| 94  | YF-BJ4/13D | 7627 NS4b | 739  | A | AAA | K | 1 | 247 G | GAA | E |
| 95  | YF-BJ4/13D | 8493 NS5  | 852  | A | AGA | R | 3 | 284 G | AGG | R |
| 96  | YF-BJ4/13D | 8626 NS5  | 985  | T | TTG | L | 1 | 329 C | CTG | L |
| 97  | YF-BJ4/13D | 10160 NS5 | 2519 | T | GTT | V | 2 | 840 C | GCT | A |
| 98  | YF-BJ4/13D | 10356 NS5 | 2715 | C | ATC | I | 3 | 905 T | ATT | I |
| 99  | YF-FZ2/D16 | 900 M     | 417  | T | GCT | A | 3 | 139 C | GCC | A |
| 100 | YF-FZ2/D16 | 1540 E    | 565  | G | GAC | D | 1 | 189 C | CAC | H |
| 101 | YF-FZ2/D16 | 1634 E    | 659  | G | GGG | G | 2 | 220 T | GTG | V |
| 102 | YF-FZ2/D16 | 1846 E    | 871  | A | ACT | T | 1 | 291 C | CCT | P |
| 103 | YF-FZ2/D16 | 1865 E    | 890  | A | TAC | Y | 2 | 297 T | TTC | F |
| 104 | YF-FZ2/D16 | 1869 E    | 894  | G | AAG | K | 3 | 298 C | AAC | N |
| 105 | YF-FZ2/D16 | 1873 E    | 898  | T | TGC | C | 1 | 300 G | GGC | G |
| 106 | YF-FZ2/D16 | 2352 E    | 1377 | A | GCA | A | 3 | 459 C | GCC | A |
| 107 | YF-FZ2/D16 | 3751 NS2a | 241  | T | TCC | S | 1 | 81 A  | ACC | T |
| 108 | YF-FZ2/D16 | 3918 NS2a | 408  | C | ATC | I | 3 | 136 A | ATA | I |
| 109 | YF-FZ2/D16 | 3948 NS2a | 438  | T | AAT | N | 3 | 146 C | AAC | N |
| 110 | YF-FZ2/D16 | 6435 NS3  | 1863 | T | GGT | G | 3 | 621 C | GGC | G |
| 111 | YF-FZ2/D16 | 6463 NS4a | 22   | G | GTC | V | 1 | 8 A   | ATC | I |
| 112 | YF-FZ2/D16 | 6495 NS4a | 54   | G | AAG | K | 3 | 18 A  | AAA | K |
| 113 | YF-FZ2/D16 | 6637 NS4a | 196  | G | GGA | G | 1 | 66 C  | CGA | R |
| 114 | YF-FZ2/D16 | 7320 NS4b | 432  | A | GTA | V | 3 | 144 G | GTG | V |
| 115 | YF-FZ2/D16 | 7634 NS4b | 746  | G | GGG | G | 2 | 249 A | GAG | E |
| 116 | YF-FZ2/D16 | 9075 NS5  | 1434 | G | ATG | M | 3 | 478 A | ATA | I |
| 117 | YF-FZ2/D16 | 9077 NS5  | 1436 | G | TGG | W | 2 | 479 A | TAG | * |
| 118 | YF-FZ2/D16 | 9084 NS5  | 1443 | G | GGG | G | 3 | 481 A | GGA | G |
| 119 | YF-FZ2/D16 | 9966 NS5  | 2325 | C | GAC | D | 3 | 775 T | GAT | D |
| 120 | YF-FZ2/D16 | 10317 NS5 | 2676 | G | AGG | R | 3 | 892 A | AGA | R |

|     |            |           |      |   |     |   |   |       |     |   |
|-----|------------|-----------|------|---|-----|---|---|-------|-----|---|
| 121 | YF-FZ4/D7  | 861 M     | 378  | T | GTT | V | 3 | 126 C | GTC | V |
| 122 | YF-FZ4/D7  | 900 M     | 417  | T | GCT | A | 3 | 139 C | GCC | A |
| 123 | YF-FZ4/D7  | 1662 E    | 687  | C | CAC | H | 3 | 229 T | CAT | H |
| 124 | YF-FZ4/D7  | 2038 E    | 1063 | A | ATT | I | 1 | 355 C | CTT | L |
| 125 | YF-FZ4/D7  | 2183 E    | 1208 | C | ACA | T | 2 | 403 A | AAA | K |
| 126 | YF-FZ4/D7  | 2352 E    | 1377 | A | GCA | A | 3 | 459 C | GCC | A |
| 127 | YF-FZ4/D7  | 2500 NS1  | 46   | G | GGA | G | 1 | 16 A  | AGA | R |
| 128 | YF-FZ4/D7  | 2632 NS1  | 178  | G | GTT | V | 1 | 60 C  | CTT | L |
| 129 | YF-FZ4/D7  | 2648 NS1  | 194  | A | CAC | H | 2 | 65 G  | CGC | R |
| 130 | YF-FZ4/D7  | 2650 NS1  | 196  | G | GAG | E | 1 | 66 A  | AAG | K |
| 131 | YF-FZ4/D7  | 2665 NS1  | 211  | A | AGG | R | 1 | 71 C  | CGG | R |
| 132 | YF-FZ4/D7  | 2676 NS1  | 222  | G | GAG | E | 3 | 74 T  | GAT | D |
| 133 | YF-FZ4/D7  | 2707 NS1  | 253  | G | GAC | D | 1 | 85 C  | CAC | H |
| 134 | YF-FZ4/D7  | 3604 NS2a | 94   | G | GTA | V | 1 | 32 T  | TTA | L |
| 135 | YF-FZ4/D7  | 3649 NS2a | 139  | A | ACA | T | 1 | 47 C  | CCA | P |
| 136 | YF-FZ4/D7  | 3664 NS2a | 154  | G | GTG | V | 1 | 52 T  | TTG | L |
| 137 | YF-FZ4/D7  | 3665 NS2a | 155  | T | GTG | V | 2 | 52 G  | GGG | G |
| 138 | YF-FZ4/D7  | 3918 NS2a | 408  | C | ATC | I | 3 | 136 A | ATA | I |
| 139 | YF-FZ4/D7  | 4490 NS2b | 308  | C | GCC | A | 2 | 103 T | GTC | V |
| 140 | YF-FZ4/D7  | 4621 NS3  | 49   | T | TGT | C | 1 | 17 G  | GGT | G |
| 141 | YF-FZ4/D7  | 4646 NS3  | 74   | A | TAT | Y | 2 | 25 T  | TTT | F |
| 142 | YF-FZ4/D7  | 4838 NS3  | 266  | G | GGG | G | 2 | 89 A  | GAG | E |
| 143 | YF-FZ4/D7  | 4903 NS3  | 331  | G | GTT | V | 1 | 111 A | ATT | I |
| 144 | YF-FZ4/D7  | 4983 NS3  | 411  | C | ACC | T | 3 | 137 A | ACA | T |
| 145 | YF-FZ4/D7  | 4998 NS3  | 426  | T | ATT | I | 3 | 142 A | ATA | I |
| 146 | YF-FZ4/D7  | 6463 NS4a | 22   | G | GTC | V | 1 | 8 A   | ATC | I |
| 147 | YF-FZ4/D7  | 7312 NS4b | 424  | C | CAT | H | 1 | 142 T | TAT | Y |
| 148 | YF-FZ4/D7  | 7313 NS4b | 425  | A | CAT | H | 2 | 142 C | CCT | P |
| 149 | YF-FZ4/D7  | 7320 NS4b | 432  | A | GTA | V | 3 | 144 G | GTG | V |
| 150 | YF-FZ4/D7  | 8112 NS5  | 471  | G | GAG | E | 3 | 157 C | GAC | D |
| 151 | YF-FZ4/D7  | 8385 NS5  | 744  | A | ACA | T | 3 | 248 T | ACT | T |
| 152 | YF-FZ4/D7  | 8424 NS5  | 783  | A | ATA | I | 3 | 261 G | ATG | M |
| 153 | YF-FZ4/D7  | 9225 NS5  | 1584 | T | GGT | G | 3 | 528 G | GGG | G |
| 154 | YF-FZ4/D7  | 9622 NS5  | 1981 | C | CGA | R | 1 | 661 T | TGA | * |
| 155 | YF-FZ6/D20 | 549 M     | 66   | G | ACG | T | 3 | 22 T  | ACT | T |
| 156 | YF-FZ6/D20 | 900 M     | 417  | T | GCT | A | 3 | 139 C | GCC | A |
| 157 | YF-FZ6/D20 | 1074 E    | 99   | A | GTA | V | 3 | 33 G  | GTG | V |
| 158 | YF-FZ6/D20 | 2352 E    | 1377 | A | GCA | A | 3 | 459 C | GCC | A |
| 159 | YF-FZ6/D20 | 3918 NS2a | 408  | C | ATC | I | 3 | 136 A | ATA | I |
| 160 | YF-FZ6/D20 | 4395 NS2b | 213  | T | TCT | S | 3 | 71 C  | TCC | S |
| 161 | YF-FZ6/D20 | 4811 NS3  | 239  | C | GCT | A | 2 | 80 G  | GGT | G |
| 162 | YF-FZ6/D20 | 5442 NS3  | 870  | G | GAG | E | 3 | 290 A | GAA | E |
| 163 | YF-FZ6/D20 | 5562 NS3  | 990  | C | TTC | F | 3 | 330 T | TTT | F |
| 164 | YF-FZ6/D20 | 6109 NS3  | 1537 | T | TAT | Y | 1 | 513 C | CAT | H |
| 165 | YF-FZ6/D20 | 6129 NS3  | 1557 | G | AAG | K | 3 | 519 A | AAA | K |
| 166 | YF-FZ6/D20 | 6463 NS4a | 22   | G | GTC | V | 1 | 8 A   | ATC | I |
| 167 | YF-FZ6/D20 | 6967 NS4b | 79   | C | CCA | P | 1 | 27 T  | TCA | S |
| 168 | YF-FZ6/D20 | 7320 NS4b | 432  | A | GTA | V | 3 | 144 G | GTG | V |
| 169 | YF-FZ6/D20 | 8288 NS5  | 647  | C | ACT | T | 2 | 216 T | ATT | I |
| 170 | YF-FZ6/D20 | 8359 NS5  | 718  | C | CTG | L | 1 | 240 A | ATG | M |
| 171 | YF-FZ6/D20 | 8370 NS5  | 729  | G | AGG | R | 3 | 243 A | AGA | R |
| 172 | YF-FZ6/D20 | 8436 NS5  | 795  | T | AGT | S | 3 | 265 C | AGC | S |
| 173 | YF-FZ6/D20 | 9184 NS5  | 1543 | T | TAC | Y | 1 | 515 C | CAC | H |

|     |            |           |      |   |     |   |   |       |     |   |
|-----|------------|-----------|------|---|-----|---|---|-------|-----|---|
| 174 | YF-FZ6/D20 | 9253 NS5  | 1612 | G | GGG | G | 1 | 538 T | TGG | W |
| 175 | YF-FZ6/D20 | 10422 NS5 | +66  | G | -   | - | - | A     | -   | - |
| 176 | YF-FZ6/D20 | 10424 NS5 | +68  | A | -   | - | - | C     | -   | - |
| 177 | YF-FZ6/D20 | 10428 NS5 | +72  | T | -   | - | - | A     | -   | - |
| 178 | YF-FZ6/D20 | 10429 NS5 | +73  | A | -   | - | - | T     | -   | - |
| 179 | YF-FZ6/D20 | 10432 NS5 | +76  | T | -   | - | - | C     | -   | - |
| 180 | YF-FZ6/D20 | 10434 NS5 | +78  | A | -   | - | - | T     | -   | - |
| 181 | YF-FZ6/D20 | 10435 NS5 | +79  | G | -   | - | - | A     | -   | - |
| 182 | YF-FZ6/D20 | 10436 NS5 | +80  | A | -   | - | - | G     | -   | - |
| 183 | YF-FZ6/D20 | 10439 NS5 | +83  | C | -   | - | - | A     | -   | - |
| 184 | YF-FZ6/D20 | 10440 NS5 | +84  | C | -   | - | - | A     | -   | - |
| 185 | YF-FZ6/D20 | 10441 NS5 | +85  | G | -   | - | - | C     | -   | - |
| 186 | YF-FZ6/D20 | 10442 NS5 | +86  | G | -   | - | - | C     | -   | - |
| 187 | YF-FZ6/D20 | 10444 NS5 | +88  | A | -   | - | - | G     | -   | - |
| 188 | YF-FZ6/D20 | 10445 NS5 | +89  | T | -   | - | - | G     | -   | - |
| 189 | YF-FZ6/D20 | 10447 NS5 | +91  | A | -   | - | - | T     | -   | - |
| 190 | YF-FZ7/D15 | 443 C     | 323  | T | GTA | V | 2 | 108 C | GCA | A |
| 191 | YF-FZ7/D15 | 900 M     | 417  | T | GCT | A | 3 | 139 C | GCC | A |
| 192 | YF-FZ7/D15 | 1043 E    | 68   | C | GCC | A | 2 | 23 T  | GTC | V |
| 193 | YF-FZ7/D15 | 2258 E    | 1283 | C | ACA | T | 2 | 428 G | AGA | R |
| 194 | YF-FZ7/D15 | 2303 E    | 1328 | A | CAG | Q | 2 | 443 G | CGG | R |
| 195 | YF-FZ7/D15 | 2334 E    | 1359 | G | ACG | T | 3 | 453 C | ACC | T |
| 196 | YF-FZ7/D15 | 2352 E    | 1377 | A | GCA | A | 3 | 459 C | GCC | A |
| 197 | YF-FZ7/D15 | 2704 NS1  | 250  | G | GTA | V | 1 | 84 T  | TTA | L |
| 198 | YF-FZ7/D15 | 2736 NS1  | 282  | G | AAG | K | 3 | 94 T  | AAT | N |
| 199 | YF-FZ7/D15 | 3578 NS2a | 68   | G | AGA | R | 2 | 23 T  | ATA | I |
| 200 | YF-FZ7/D15 | 3918 NS2a | 408  | C | ATC | I | 3 | 136 A | ATA | I |
| 201 | YF-FZ7/D15 | 4329 NS2b | 147  | T | GAT | D | 3 | 49 C  | GAC | D |
| 202 | YF-FZ7/D15 | 5001 NS3  | 429  | G | GTG | V | 3 | 143 A | GTA | V |
| 203 | YF-FZ7/D15 | 5003 NS3  | 431  | A | AAC | N | 2 | 144 T | ATC | I |
| 204 | YF-FZ7/D15 | 5025 NS3  | 453  | G | GGG | G | 3 | 151 C | GGC | G |
| 205 | YF-FZ7/D15 | 5258 NS3  | 686  | C | ACC | T | 2 | 229 A | AAC | N |
| 206 | YF-FZ7/D15 | 5459 NS3  | 887  | C | CCT | P | 2 | 296 A | CAT | H |
| 207 | YF-FZ7/D15 | 6463 NS4a | 22   | G | GTC | V | 1 | 8 A   | ATC | I |
| 208 | YF-FZ7/D15 | 6648 NS4a | 207  | T | ATT | I | 3 | 69 A  | ATA | I |
| 209 | YF-FZ7/D15 | 7320 NS4b | 432  | A | GTA | V | 3 | 144 G | GTG | V |
| 210 | YF-FZ7/D15 | 7707 NS5  | 66   | A | CAA | Q | 3 | 22 C  | CAC | H |
| 211 | YF-FZ7/D15 | 8151 NS5  | 510  | G | AAG | K | 3 | 170 A | AAA | K |
| 212 | YF-FZ7/D15 | 8303 NS5  | 662  | A | TAC | Y | 2 | 221 G | TGC | C |
| 213 | YF-FZ7/D15 | 9304 NS5  | 1663 | A | ATG | M | 1 | 555 T | TTG | L |
| 214 | YF-FZ7/D15 | 9630 NS5  | 1989 | T | GCT | A | 3 | 663 C | GCC | A |
| 215 | YF-FZ7/D15 | 9818 NS5  | 2177 | G | AGG | R | 2 | 726 A | AAG | K |
| 216 | YF-FZ7/D15 | 9839 NS5  | 2198 | G | AGA | R | 2 | 733 A | AAA | K |
| 217 | YF-FZ7/D15 | 9863 NS5  | 2222 | G | AGA | R | 2 | 741 A | AAA | K |
